# Supplementary material
Source: PubMed Central journal article supplement (PMC5543256)
Supplement: onc201752x1.pdf [file onc201752x1.pdf]

Supplemental Figure 1

## MCF-7

| mRNA              | Position | Complex      | Heteroplasmy |
|-------------------|----------|--------------|--------------|
| Missense          | A8860G   | ATP8 (C-V)   |              |
|                   | G9966A   | COX3 (C-IV)  |              |
|                   | T14319C  | ND6 (C-I)    |              |
|                   | A15326G  | CYTB (C-III) |              |
|                   | A15380G  | CYTB (C-III) |              |
| Frameshift        |          |              |              |
| Stop codon        |          |              |              |
|                   |          |              |              |
| <b>Modifiers</b>  |          |              |              |
| D-loop            | G225T    |              |              |
|                   | A263G    |              |              |
|                   | C16148T  |              |              |
|                   | T16519C  |              |              |
| tRNA              |          |              |              |
| rRNA              | G709A    |              |              |
|                   | A750G    |              |              |
|                   | A1438G   |              |              |
|                   |          |              |              |
| <b>Synonymous</b> | A4769G   | ND2 (C-I)    |              |
|                   | T6776C   | COX1 (C-IV)  |              |
|                   | T13260C  | ND5 (C-I)    |              |
|                   |          |              |              |
|                   | A5894AC  | Unannotated  |              |

## MCF-7R

| mRNA              | Position | Complex      | Heteroplasmy  |
|-------------------|----------|--------------|---------------|
| Missense          | A8860G   | ATP8 (C-V)   |               |
|                   | G9966A   | COX3 (C-IV)  |               |
|                   | T14319C  | ND6 (C-I)    |               |
|                   | A15326G  | CYTB (C-III) |               |
|                   | A15380G  | CYTB (C-III) |               |
| Frameshift        |          |              |               |
| Stop codon        |          |              |               |
|                   |          |              |               |
| <b>Modifiers</b>  |          |              |               |
| D-loop            | C16148T  |              |               |
| tRNA              |          |              |               |
| rRNA              | A750G    |              |               |
|                   | A1438G   |              |               |
|                   | G2098A   |              | 11/19 (57.9%) |
|                   |          |              |               |
| <b>Synonymous</b> | A4769G   | ND2 (C-I)    |               |
|                   | T6776C   | COX1 (C-IV)  |               |
|                   | T13260C  | ND5 (C-I)    |               |
|                   |          |              |               |
|                   | A5894AC  | Unannotated  |               |
