# Supplementary material
Source: PubMed Central journal article supplement (PMC5543256)
Supplement: onc201752x2.pdf [file onc201752x2.pdf]

Supplemental Figure 2

## ZR75.1

| mRNA              | Position | Complex      | Heteroplasmy  |
|-------------------|----------|--------------|---------------|
| Missense          | A8860G   | ATP8 (C-V)   |               |
|                   | G9477A   | COX3 (C-IV)  |               |
|                   | T10326A  | ND3 (C-I)    |               |
|                   | C12346T  | ND5 (C-I)    |               |
|                   | A13105G  | ND5 (C-I)    |               |
|                   | C14766T  | CYTB (C-III) |               |
|                   | A14793G  | CYTB (C-III) |               |
|                   | A15218G  | CYTB (C-III) |               |
|                   | A15326G  | CYTB (C-III) |               |
| Frameshift        |          |              |               |
| Stop retained     | G8269A   | COX2 (C-IV)  | 27/29 (93.1%) |
| <b>Modifiers</b>  |          |              |               |
| D-loop            | A73G     |              |               |
|                   | A263G    |              |               |
|                   | C16256T  |              |               |
|                   | C16270T  |              |               |
|                   | G16390A  |              | 50/52 (96.2%) |
|                   | A16399G  |              | 40/42 (95.2%) |
| tRNA              | C8349T   |              |               |
|                   | A12308G  |              |               |
| rRNA              | A750G    |              |               |
|                   | A1438G   |              |               |
|                   | T1700C   |              |               |
|                   | A2706G   |              |               |
|                   | T3197C   |              |               |
| <b>Synonymous</b> |          |              |               |
|                   | A4769G   | ND2 (C-I)    |               |
|                   | C7028T   | COX1 (C-V)   |               |
|                   | A11467G  | ND4 (C-I)    |               |
|                   | G11719A  | ND4 (C-I)    |               |
|                   | G12372A  | ND5 (C-I)    |               |
|                   | T14278C  | ND6 (C-I)    |               |

## MDA-MB-361

| mRNA              | Position | Complex      | Low Heteroplasmy |
|-------------------|----------|--------------|------------------|
| Missense          | A8860G   | ATP8 (C-V)   |                  |
|                   | C12084T  | ND4 (C-I)    |                  |
|                   | A13966G  | ND5 (C-I)    |                  |
|                   | C14766T  | CYTB (C-III) |                  |
|                   | A15326G  | CYTB (C-III) |                  |
| Frameshift        |          |              |                  |
| Stop codon        |          |              |                  |
| <b>Modifiers</b>  |          |              |                  |
| D-loop            | A73G     |              |                  |
|                   | A153G    |              |                  |
|                   | T195C    |              |                  |
|                   | C16184A  |              | 32/34 (94.1%)    |
|                   | T16189C  |              | 31/34 (91.2%)    |
| tRNA              |          |              |                  |
| rRNA              | G709A    |              |                  |
|                   | A1438G   |              |                  |
|                   | C1706T   |              | 16/65 (24.6%)    |
|                   | G1719A   |              |                  |
|                   | A2706G   |              |                  |
| <b>Synonymous</b> |          |              |                  |
|                   | A4769G   | ND2 (C-I)    |                  |
|                   | T6221C   | COX1 (C-IV)  |                  |
|                   | C6371T   | COX1 (C-IV)  |                  |
|                   | C7028T   | COX1 (C-IV)  | 39/41 (95.1%)    |
|                   | G11719A  | ND4 (C-I)    | 50/54 (92.6%)    |
|                   | C12705T  | ND5 (C-I)    |                  |
