# Supplementary material
Source: PubMed Central journal article supplement (PMC5543256)
Supplement: onc201752x3.pdf [file onc201752x3.pdf]

Supplemental Figure 3

## MDA-MB-157

| mRNA              | Position        | Complex      | Heteroplasmy  |
|-------------------|-----------------|--------------|---------------|
| Missense          | A8701G          | ATP8 (C-V)   | 45/49 (91.8%) |
|                   | A8860G          | ATP8 (C-V)   |               |
|                   | C8932T          | ATP8 (C-V)   | 39/41 (95.1%) |
|                   | A10398G         | ND3 (C-I)    | 39/43 (90.7%) |
|                   | C14766T         | CYTB (C-III) |               |
|                   | A14769G         | CYTB (C-III) | 51/53 (96.2%) |
|                   | A15326G         | CYTB (C-III) |               |
|                   | Initiator Codon | A8527G       | ATP6 (C-V)    |
| Frameshift        | GA6691G         | COX1 (C-IV)  | 40/78 (51.3%) |
|                   | A9531AC         | COX3 (C-IV)  | 13/24 (54.2%) |
| Stop gained       | T15514A         | CYTB (C-III) | 18/40 (45.0%) |
| <b>Modifiers</b>  |                 |              |               |
| D-loop            | G16129A         |              | 57/62 (8.1%)  |
|                   | T16209C         |              |               |
|                   | C16223T         |              |               |
|                   | C16292T         |              |               |
|                   | C16295T         |              | 54/56 (96.4%) |
|                   | T16311C         |              | 50/53 (94.3%) |
|                   | T16519C         |              |               |
| tRNA              | G4412A          |              | 14/20 (70.0%) |
|                   | C5601T          |              |               |
|                   | CT15939C        |              | 64/70 (91.4%) |
| rRNA              | A750G           |              |               |
|                   | A1438G          |              |               |
|                   | T1822C          |              |               |
|                   | A2706G          |              | 36/38 (94.7%) |
| <b>Synonymous</b> |                 |              |               |
|                   | T3396C          | ND1 (C-I)    | 48/53 (90.6%) |
|                   | T4218C          | ND1 (C-I)    |               |
|                   | A4769G          | ND2 (C-I)    |               |
|                   | C7028T          | COX1 (C-IV)  | 29/31 (93.5%) |
|                   | C7819A          | COX2 (C-IV)  |               |
|                   | C8410T          | ATP6 (C-V)   | 41/48 (85.4%) |
|                   | T9540C          | COX3 (C-IV)  | 24/26 (92.3%) |
|                   | T9950C          | COX3 (C-IV)  |               |
|                   | C10070T         | ND3 (C-I)    | 18/20 (90.0%) |
|                   | T10873C         | ND4 (C-I)    | 24/28 (85.7%) |
|                   | G11440A         | ND4 (C-I)    |               |
|                   | G11719A         | ND4 (C-I)    | 62/64 (96.9%) |
|                   | C12705T         | ND5 (C-I)    |               |
|                   | T13602C         | ND5 (C-I)    | 13/47 (27.7%) |
|                   | G15301A         | CYTB (C-III) |               |
|                   | T15514C         | CYTB (C-III) | 21/40 (52.5%) |
