# Supplementary material
Source: PubMed Central journal article supplement (PMC5543256)
Supplement: onc201752x4.pdf [file onc201752x4.pdf]

Supplemental Figure 4

## MDA-MB-231

| mRNA              | Position | Complex      | Heteroplasmy    |
|-------------------|----------|--------------|-----------------|
| Missense          | A8860G   | ATP8 (C-V)   |                 |
|                   | C12084T  | ND4 (C-I)    |                 |
|                   | A13966G  | ND5 (C-I)    |                 |
|                   | C14766T  | CYTB (C-III) | 143/145 (98.6%) |
|                   | A15326G  | CYTB (C-III) |                 |
| Frameshift        |          |              |                 |
| Stop codon        |          |              |                 |
| <b>Modifiers</b>  |          |              |                 |
| D-loop            | A73G     |              |                 |
|                   | A153G    |              |                 |
|                   | T195C    |              |                 |
|                   | A263G    |              |                 |
|                   | A302AC   |              |                 |
|                   | T310TC   |              |                 |
|                   | G513GCA  |              | 46/48 (95.8%)   |
|                   | T16093C  |              |                 |
|                   | C16184A  |              | 36/95 (37.9%)   |
|                   | T16189C  |              |                 |
|                   | C16223T  |              |                 |
|                   | A16265G  |              |                 |
|                   | C16278T  |              |                 |
| T16519C           |          |              |                 |
| tRNA              |          |              |                 |
| rRNA              | G709A    |              |                 |
|                   | A750G    |              |                 |
|                   | A1438G   |              |                 |
|                   | G1719A   |              |                 |
|                   | A2706G   |              |                 |
| <b>Synonymous</b> |          |              |                 |
|                   | A4769G   | ND2 (C-I)    |                 |
|                   | T6221C   | COX1 (C-IV)  |                 |
|                   | C6371T   | COX1 (C-IV)  |                 |
|                   | C7028T   | COX1 (C-IV)  |                 |
|                   | T8506C   | ATP6 (C-V)   |                 |
|                   | C9099T   | ATP8 (C-V)   | 36/224 (16.1%)  |
|                   | G11719A  | ND4 (C-I)    |                 |
|                   | C12705T  | ND5 (C-I)    |                 |
|                   | T14470C  | ND6 (C-I)    |                 |
|                   | T15310C  | CYTB (C-III) |                 |
