# Supplementary material
Source: PubMed Central journal article supplement (PMC5543256)
Supplement: onc201752x7.pdf [file onc201752x7.pdf]

Supplemental Figure 7

## WT

| mRNA              | Position | Complex      | Heteroplasmy |
|-------------------|----------|--------------|--------------|
| Missense          | G6267A   | COX1 (C-IV)  |              |
|                   | C14766T  | CYTB (C-III) |              |
| Frameshift        |          |              |              |
| Stop codon        |          |              |              |
| <b>Modifiers</b>  |          |              |              |
| D-loop            | A73G     |              |              |
|                   | A153G    |              |              |
|                   | C16114A  |              | 1/16 (6.3%)  |
|                   | T16126C  |              |              |
|                   | T16189A  |              | 1/31 (3.2%)  |
|                   | C16223T  |              |              |
|                   | C16278T  |              |              |
|                   | C16366T  |              |              |
| tRNA              | G15894A  |              |              |
| rRNA              | A1438G   |              |              |
|                   | A1719G   |              |              |
|                   | A2706G   |              |              |
|                   |          |              |              |
| <b>Synonymous</b> | T6221C   | COX1 (C-IV)  |              |
|                   | C6371T   | COX1 (C-IV)  |              |
|                   | C7028T   | COX1 (C-IV)  |              |
|                   | G11719A  | ND4 (C-I)    |              |
|                   | C11932T  | ND4 (C-I)    |              |

## CYB

| mRNA              | Position    | Complex      | Heteroplasmy |
|-------------------|-------------|--------------|--------------|
| Missense          | T6520C      | COX1 (C-IV)  |              |
|                   | A8642G      | ATP6 (C-V)   |              |
|                   | A8860G      | ATP6 (C-V)   |              |
|                   | C14766T     | CYTB (C-III) |              |
|                   | A15326G     | CYTB (C-III) |              |
|                   | T15693C     | CYTB (C-III) |              |
|                   | C15789T     | CYTB (C-III) |              |
| Frameshift        | AAATT14780A | CYTB (C-III) | 1/21 (4.8%)  |
| Stop codon        |             |              |              |
| <b>Modifiers</b>  |             |              |              |
| D-loop            | T195C       |              |              |
|                   | T16356C     |              |              |
|                   | T15362C     |              |              |
| tRNA              | T12297C     |              |              |
|                   | A12308G     |              |              |
| rRNA              | A1438G      |              |              |
|                   | G1462A      |              |              |
|                   | T2083C      |              |              |
|                   | A2706G      |              |              |
|                   |             |              |              |
| <b>Synonymous</b> | A4769G      | ND2 (C-I)    |              |
|                   | T5999C      | COX1 (C-IV)  |              |
|                   | A6047G      | COX1 (C-IV)  |              |
|                   | C7028T      | COX1 (C-IV)  |              |
|                   | T7705C      | COX2 (C-IV)  |              |
|                   | C11332T     | ND4 (C-I)    |              |
|                   | T11339C     | ND4 (C-I)    |              |
|                   | A11467G     | ND4 (C-I)    |              |
|                   | G11719A     | ND4 (C-I)    |              |
|                   | G12372A     | ND5 (C-I)    |              |
|                   | C14620T     | ND6 (C-I)    |              |
