# Supplementary material
Source: PubMed Central journal article supplement (PMC5543256)
Supplement: onc201752x8.pdf [file onc201752x8.pdf]

## Hybrid B

| mRNA              | Position    | Complex      | Heteroplasmy |
|-------------------|-------------|--------------|--------------|
| Missense          | T6520C      | COX1 (C-IV)  | 1/11 (9.1%)  |
|                   | A8642G      | ATP6 (C-V)   | 1/15 (6.7%)  |
|                   | A8860G      | ATP6 (C-V)   |              |
|                   | C14766T     | CYTB (C-III) |              |
|                   | T15693C     | CYTB (C-III) | 2/17 (11.8%) |
|                   | C15789T     | CYTB (C-III) | 1/15 (6.7%)  |
| Frameshift        | AAATT14780A | CYTB (C-III) |              |
| Stop codon        |             |              |              |
| <b>Modifiers</b>  |             |              |              |
| D-loop            | T16356C     |              |              |
|                   | T16362C     |              |              |
| tRNA              | T12297C     |              | 2/13 (15.4%) |
|                   | A12308G     |              | 2/12 (16.7%) |
| rRNA              | A1438G      |              | 1/16 (6.3%)  |
|                   | G1462A      |              | 4/15 (26.7%) |
|                   | A1811G      |              |              |
|                   | T2083C      |              | 3/29 (10.3%) |
|                   | A2706G      |              |              |
| <b>Synonymous</b> | A3672G      | ND1 (C-I)    | 1/13 (7.7%)  |
|                   | T5999C      | COX1 (C-IV)  | 2/15 (13.3%) |
|                   | A6047G      | COX1 (C-IV)  | 1/13 (7.7%)  |
|                   | C6236T      | COX1 (C-IV)  | 2/16 (12.5%) |
|                   | C7928C      | COX1 (C-IV)  | 1/19 (5.3%)  |
|                   | C11332T     | ND4 (C-I)    | 2/13 (15.4%) |
|                   | T11339C     | ND4 (C-I)    | 2/17 (11.8%) |
|                   | A11467G     | ND4 (C-I)    | 4/23 (17.4%) |
|                   | G11719A     | ND4 (C-I)    | 2/12 (16.7%) |
|                   | C14620T     | ND6 (C-I)    |              |
