# Supplementary material
Source: PubMed Central journal article supplement (PMC5543256)
Supplement: onc201752x9.pdf [file onc201752x9.pdf]

## COX1

| mRNA              | Position | Complex      | Heteroplasmy |
|-------------------|----------|--------------|--------------|
| Missense          | A8860G   | ATP6 (C-V)   |              |
|                   | C14766T  | CYTB (C-III) |              |
|                   | A15326G  | CYTB (C-III) |              |
|                   | C15452A  | CYTB (C-III) |              |
|                   | G15812A  | CYTB (C-III) |              |
| Frameshift        |          |              |              |
| Stop codon        |          |              |              |
| Stop gained       | G6930A   | COX1 (C-IV)  |              |
| <b>Modifiers</b>  |          |              |              |
| D-loop            | C16069T  |              |              |
|                   | T16126T  |              |              |
|                   | C16193T  |              |              |
| tRNA              | C5633T   |              |              |
| rRNA              | A1438G   |              |              |
| <b>Synonymous</b> | C7028T   | COX1 (C-IV)  |              |
|                   | G11719G  | ND4 (C-I)    |              |
|                   | C15886T  | CYTB (C-III) |              |

## Hybrid E

| mRNA              | Position | Complex      | Heteroplasmy |
|-------------------|----------|--------------|--------------|
| Missense          | T4216C   | ND1 (C-I)    | 2/13 (15.4%) |
|                   | A8860G   | ATP6 (C-V)   |              |
|                   | G15257A  | CYTB (C-III) | 7/27 (25.9%) |
|                   | A15326G  | CYTB (C-III) |              |
|                   | C15453A  | CYTB (C-III) | 5/26 (19.2%) |
|                   | G15812A  | CYTB (C-III) | 3/15 (20.0%) |
| Frameshift        |          |              |              |
| Stop codon        |          |              |              |
| Stop gained       | G6930A   | COX1 (C-IV)  | 8/36 (22.2%) |
| <b>Modifiers</b>  |          |              |              |
| D-loop            | A73G     |              |              |
|                   | C150T    |              | 1/13 (7.7%)  |
|                   | T152C    |              | 1/13 (7.7%)  |
|                   | T16126C  |              |              |
|                   | C16193T  |              | 3/25 (12.0%) |
|                   | C16278T  |              | 3/25 (12.0%) |
| tRNA              | C5633T   |              |              |
| rRNA              | A750G    |              |              |
|                   | G1438A   |              |              |
|                   | G2706G   |              |              |
| <b>Synonymous</b> | C7028T   | COX1 (C-IV)  |              |
|                   | G11719A  | ND4 (C-I)    |              |
