# Supplementary material
Source: PubMed Central journal article supplement (PMC5543256)

**Supplemental Figure 5**

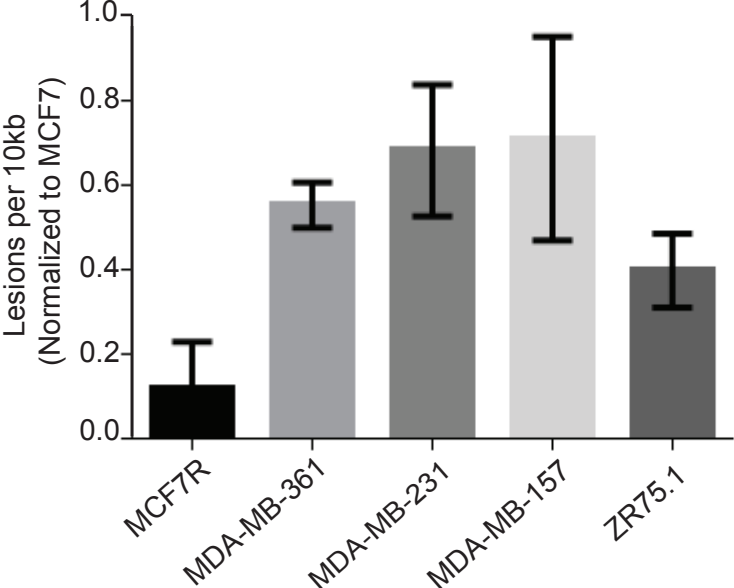

Supplement: onc201752x5.pdf [file onc201752x5.pdf]

# Supplemental Figure 6

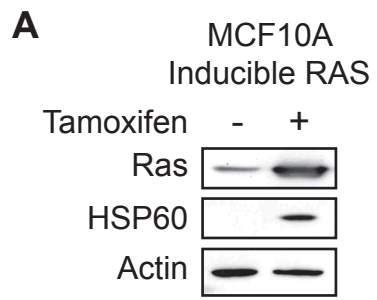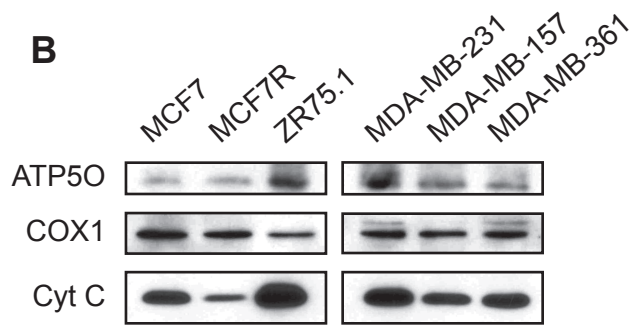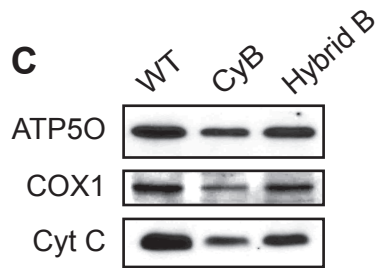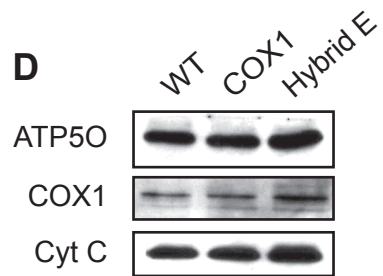

Supplement: onc201752x6.pdf [file onc201752x6.pdf]
